# Supplementary material for: Improved salt tolerance of Chenopodium quinoa Willd. contributed by Pseudomonas sp. strain M30-35
Source: PeerJ journal article supplement (doi:10.7717/peerj.10702), 2021-01-13
Supplement: one-way_analysis_of_variance.zip [file SPSS Analysis.xlsx]

## Sheet: LB,M30-35
Different treatment	chlorophyll a（mg/g）	chlorophyll b（mg/g）	Root dry weight（mg）	Shoot dry weight（mg）	The total dry weight（mg）	Root activity[μg/(g*h)]	Total phosphorus content(mg/g)	Content of saponins(mg/g)		annotation
1	2.02076	0.56031	6.2	66.4	72.6	1091.59	10.7407		1	1，2，3，7，8，9	LB
1	1.76526	0.44873	2.5	55.2	61.2	895.566	11.6071		1	4，5，6，10，11，12	M30-35
1	1.56387	0.71931	6	37.8	38.7	969.074	12.9849		1	1,4,7,10	0mM-NaCl
1	1.61126	0.666952	3.8	32.7	36.5	1579.19	9.5821		2	2,5,8,11	150mM-NaCl
1	1.76451	0.56262	1.9	25	26.9	1577.96	10.5006		2	3,6,9,12	300mM-NaCl
1	1.90999	0.526688	6.6	64.8	71.4	1618.39	9.1541		2	1,2,3,4,5,6，	7d
2	1.6261	0.622176	4.5	57.3	61.8	1027.88	10.0831		3	7,8,9,10,11,12，	21d
2	0.983712	0.268096	7.1	49.3	56.4	1075.66	10.6363		3
2	1.47604	0.41945	3.2	35.9	39.1	904.142	10.6572		3
2	0.884542	0.282656	3.4	22.6	26	994.802	10.7511		4
2	1.28763	0.318198	4.3	37.3	41.6	917.619	10.772		4
2	2.02368	0.620414	5.4	66.2	71.6	904.142	10.3023		4
3	0.969254	0.37391	3.4	40.5	43.9	1819.31	11.106		5
3	0.912238	0.167612	4	40.7	34.8	1623.29	10.8138		5
3	1.30119	0.155906	6	47.7	44.9	1900.17	11.3148		5
3	0.841156	0.364132	2.8	32	20.9	1263.1	11.0956		6
3	0.859942	0.134374	3.3	41.6	39.2	1103.84	10.6781		6
3	1.34087	0.386048	2.2	18.7	43.6	1089.14	9.7804		6
4	1.76211	0.497956	9.8	40.9	50.7	1091.59	8.9141	3.87876	7
4	1.79599	0.586024	6.5	25.3	31.8	659.117	8.34	3.69022	7
4	1.58314	0.742824	3.5	42.3	45.8	899.242	10.1144	3.6184	7
4	1.59542	0.463016	9.7	65.2	74.9	1514.25	8.3713	5.60253	8
4	1.58931	0.70997	6.9	32.9	39.8	1305.98	7.6197	5.52173	8
4	1.60772	0.419174	5.9	36.5	42.4	1574.29	6.7743	5.62049	8
5	1.48462	0.45126	10.1	80.4	86.6	1014.4	6.1689	3.35803	9
5	1.46845	0.400386	7.7	63.5	71.2	1007.05	5.6783	3.22336	9
5	1.44806	0.429724	4	43.1	47.1	1049.93	6.8473	3.42986	9
5	1.39813	0.718982	7	46.8	53.8	1007.05	8.2773	3.6184	10
5	1.37612	0.5479	7.4	53	60.4	874.739	7.6302	3.72613	10
5	1.29216	0.342756	6.2	62.9	73	987.451	8.5696	3.35803	10
6	1.33739	0.35237	6.6	36.6	43.2	1584.09	7.7346	5.60253	11
6	1.44273	0.304956	6.3	28.7	35	1609.81	6.8682	5.31524	11
6	1.52301	0.32792	2.9	20.7	23.6	1498.33	7.317	5.22546	11
6	1.58123	0.201668	4.3	37.1	41.4	1451.77	7.1605	4.10321	12
6	1.3867	0.111404	7.2	23.1	30.3	1305.98	7.2544	3.95956	12
6	1.47345	0.44225	3.6	21.5	25.1	1146.72	7.244	3.69022	12
7	0.942226	0.292067	30.9	223.5	251.4
7	0.604034	0.219588	35.6	255.2	278
7	0.622924	0.182064	32.2	178.6	209.5
7	0.436498	0.106304	59.6	210.4	246
7	0.647328	0.181844	63.5	184.8	248.3
7	1.07153	0.33199	44.7	206.7	251.4
8	0.725582	0.201182	25.9	161.3	197.2
8	0.245088	0.224646	21.3	180.2	201.5
8	0.452614	0.179044	29.8	168.4	198.2
8	0.675404	0.127838	19.8	186.4	229.6
8	0.860932	0.14712	19.8	218.5	238.3
8	0.522246	0.188438	23.2	188.4	218.2
9	0.659058	0.164428	12.2	104.6	116.8
9	1.0508	0.278424	11.4	103.8	115.2
9	0.498026	0.101194	9.8	103.5	117.6
9	0.424296	0.106414	14.1	87	117.7
9	0.664192	0.140694	12.2	106.1	118.3
9	0.907576	0.208652	17.1	90.5	107.6
10	0.373566	0.295462	25.1	218.8	243.9
10	0.852356	0.11531	67.1	237.2	304.3
10	0.559612	0.310184	52	98.7	150.7
10	0.94927	0.206454	66.2	392.9	459.1
10	0.66509	0.197172	65.8	199.5	265.3
10	0.704148	0.23964	66	264.7	330.7
11	0.495436	0.123994	30.6	207.3	247.9
11	0.775852	0.230794	39.3	252.6	290.3
11	0.619436	0.148386	31	223.5	234.6
11	0.658678	0.10339	24.5	207.3	237.9
11	0.483798	0.097678	40.6	208.2	247.5
11	0.7865	0.244364	37.7	185.1	216.1
12	0.936504	0.23299	28.9	182.2	201.1
12	0.821598	0.235848	22.2	133.3	145.5
12	0.674012	0.547852	14.9	123.8	135.4
12	1.16656	0.35391	19.3	106.5	121.4
12	0.734296	0.167394	27.1	108.1	127.4
12	0.558472	0.12707	19.3	160.5	187.6
