# Supplementary material for: Improved salt tolerance of Chenopodium quinoa Willd. contributed by Pseudomonas sp. strain M30-35
Source: PeerJ. 2021 Jan 13;9:e10702. doi: 10.7717/peerj.10702 (PMC7811290; doi:10.7717/peerj.10702)
Supplement: Supplemental Information 1 — From the phosphorus standards, a calibration curve was generated. The standard curve of Oleanolic acid(mg/ml) concentration was constructed from 0 to 0.7.The root activity of each group was calculated by the standard curve. [file peerj-09-10702-s001.xlsx]

## Sheet: saponin content
The content calculation of saponins
	absorbance	content
M30-35/0mM	0.482	0.36184
M30-35/0mM	0.494	0.372613
M30-35/0mM	0.453	0.335803
M30-35/150mM	0.703	0.560253
M30-35/150mM	0.671	0.531524
M30-35/150mM	0.661	0.522546
M30-35/300mM	0.536	0.410321
M30-35/300mM	0.52	0.395956
M30-35/300mM	0.49	0.369022
LB/0mM	0.511	0.387876
LB/0mM	0.49	0.369022
LB/0mM	0.482	0.36184
LB/150mM	0.703	0.560253
LB/150mM	0.694	0.552173
LB/150mM	0.705	0.562049
LB/300mM	0.453	0.335803
LB/300mM	0.438	0.322336
LB/300mM	0.461	0.342986

## Sheet: chlorophyll content
Determination of chlorophyll content
Time-species-salt concentration	663nm	645nm	Chlorophyll a	Chlorophyll b	The total chlorophyll
The first week-LB-0mM	0.855	0.298	2.02076	0.56031	2.58107
	0.745	0.251	1.76526	0.44873	2.21399
	0.675	0.296	1.56387	0.71931	2.28318
	0.692	0.288	1.61126	0.666952	2.27822
	0.75	0.277	1.76451	0.56262	2.32713
	0.808	0.281	1.90999	0.526688	2.43668
			1.77261	0.580768	2.35338
The first week-LB-150mM	0.696	0.279	1.6261	0.622176	2.24828
	0.416	0.144	0.983712	0.268096	1.25181
	0.625	0.22	1.47604	0.41945	1.89549
	0.376	0.139	0.884542	0.282656	1.1672
	0.543	0.181	1.28763	0.318198	1.60583
	0.859	0.312	2.02368	0.620414	2.64409
			1.38028	0.421832	1.80212
The first week-LB-300mM	0.415	0.167	0.969254	0.37391	1.34316
	0.382	0.115	0.912238	0.167612	1.07985
	0.541	0.145	1.30119	0.155906	1.4571
	0.362	0.154	0.841156	0.364132	1.20529
	0.359	0.103	0.859942	0.134374	0.994316
	0.568	0.201	1.34087	0.386048	1.72692
			1.03744	0.263664	1.30111
The first week-M3035-0mM	0.746	0.262	1.76211	0.497956	2.26006
	0.764	0.285	1.79599	0.586024	2.38201
	0.684	0.303	1.58314	0.742824	2.32597
	0.676	0.24	1.59542	0.463016	2.05844
	0.685	0.296	1.58931	0.70997	2.29928
	0.679	0.231	1.60772	0.419174	2.02689
The first week-M3035-150mM	0.63	0.228	1.48462	0.45126	1.93588
	0.621	0.215	1.46845	0.400386	1.86884
	0.614	0.22	1.44806	0.429724	1.87778
	0.607	0.282	1.39813	0.718982	2.11711
	0.59	0.241	1.37612	0.5479	1.92402
	0.546	0.187	1.29216	0.342756	1.63491
			1.41126	0.481835	1.89309
The first week-M3035-300mM	0.565	0.193	1.33739	0.35237	1.68976
	0.606	0.191	1.44273	0.304956	1.74768
	0.64	0.203	1.52301	0.32792	1.85093
	0.658	0.179	1.58123	0.201668	1.7829
	0.574	0.142	1.3867	0.111404	1.4981
	0.625	0.225	1.47345	0.44225	1.9157
The third week-LB-0mM	0.4001	0.146	0.942226	0.292067	1.23429
	0.258	0.101	0.604034	0.219588	0.823622
	0.264	0.094	0.622924	0.182064	0.804988
	0.184	0.061	0.436498	0.106304	0.542802
	0.274	0.096	0.647328	0.181844	0.829172
	0.455	0.166	1.07153	0.33199	1.40352
			0.720757	0.218976	0.939733
The third week-LB-150mM	0.307	0.107	0.725582	0.201182	0.926764
	0.111	0.072	0.245088	0.224646	0.469734
	0.194	0.079	0.452614	0.179044	0.631658
	0.283	0.086	0.675404	0.127838	0.803242
	0.36	0.106	0.860932	0.14712	1.00805
	0.223	0.087	0.522246	0.188438	0.710684
			0.580311	0.178045	0.758356
The third week-LB-300mM	0.278	0.093	0.659058	0.164428	0.823486
	0.444	0.152	1.0508	0.278424	1.32922
	0.209	0.065	0.498026	0.101194	0.59922
	0.179	0.06	0.424296	0.106414	0.53071
	0.279	0.088	0.664192	0.140694	0.804886
	0.382	0.124	0.907576	0.208652	1.11623
			0.700658	0.166634	0.867292
The third week-M3035-0mM	0.167	0.099	0.373566	0.295462	0.669028
	0.355	0.098	0.852356	0.11531	0.967666
	0.244	0.118	0.559612	0.310184	0.869796
	0.399	0.127	0.94927	0.206454	1.15572
	0.282	0.101	0.66509	0.197172	0.862262
	0.3	0.114	0.704148	0.23964	0.943788
			0.684007	0.22737	0.911377
The third week-M3035-150mM	0.209	0.07	0.495436	0.123994	0.61943
	0.329	0.118	0.775852	0.230794	1.00665
	0.261	0.086	0.619436	0.148386	0.767822
	0.275	0.079	0.658678	0.10339	0.762068
	0.203	0.063	0.483798	0.097678	0.581476
	0.334	0.122	0.7865	0.244364	1.03086
			0.636617	0.158101	0.794718
The third week-M3035-300mM	0.395	0.132	0.936504	0.23299	1.16949
	0.348	0.123	0.821598	0.235848	1.05745
	0.302	0.182	0.674012	0.547852	1.22186
	0.495	0.179	1.16656	0.35391	1.52047
	0.309	0.1	0.734296	0.167394	0.90169
	0.235	0.076	0.558472	0.12707	0.685542
			0.81524	0.277511	1.09275

## Sheet: total phosphorus
Determination of total phosphorus content
species	LB		LB		LB		M30-35		M30-35		M30-35			10.7407	10.7407
Salt concentration	0mM		150mM		300mM		0mM		150mM		300mM			11.6071	11.6071
														12.9849	12.9849
														9.58208	9.5821
	absorbance		absorbance		absorbance		absorbance		absorbance		absorbance			10.5006	10.5006
														9.15413	9.1541
The first week	1.029	10.7407	0.918	9.58208	0.966	10.0831	1.03	10.7511	1.064	11.106	1.063	11.0956		10.0831	10.0831
	1.112	11.6071	1.006	10.5006	1.019	10.6363	1.032	10.772	1.036	10.8138	1.023	10.6781		10.6363	10.6363
	1.244	12.9849	0.877	9.15413	1.021	10.6572	0.987	10.3023	1.084	11.3148	0.937	9.78041		10.6572	10.6572
The average	1.12833	11.7775	0.933667	9.74561	1.002	10.4589	1.01633	10.6085	1.06133	11.0782	1.00767	10.518		10.7511	10.7511
						0								10.772	10.772
the second week	0.854	8.91405	0.724	7.55711	0.524	5.46951	0.764	7.97463	0.727	7.58843	0.774	8.07901		10.3023	10.3023
	0.799	8.33996	0.746	7.78675	0.535	5.58433	0.761	7.94332	0.722	7.53624	0.835	8.71573		11.106	11.106
	0.829	8.6531	0.752	7.84938	0.643	6.71163	0.843	8.79923	0.72	7.51536	0.822	8.58004		10.8138	10.8138
The average	0.827	8.63223	0.714	7.45273	0.567	5.91835	0.789	8.23558	0.723	7.54667	0.811	8.46522		11.3148	11.3148
		0		0		0		0		0		0		11.0956	11.0956
The third week	0.854	8.91405	0.802	8.37128	0.591	6.16886	0.793	8.27733	0.741	7.73456	0.686	7.16047		10.6781	10.6781
	0.799	8.33996	0.73	7.61974	0.544	5.67827	0.731	7.63018	0.658	6.8682	0.695	7.25441		9.78041	9.7804
	0.969	10.1144	0.649	6.77426	0.656	6.84733	0.821	8.5696	0.701	7.31704	0.694	7.24397		8.91405	8.9141
The average	0.874	9.12281	0.727	7.58843	0.597	6.23149	0.781667	8.15904	0.7	7.3066	0.691667	7.21962		8.33996	8.34
														10.1144	10.1144
1	10.7407	10.7407												8.37128	8.3713
1	11.6071	11.6071												7.61974	7.6197
1	12.9849	12.9849												6.77426	6.7743
2	9.58208	9.5821												6.16886	6.1689
2	10.5006	10.5006												5.67827	5.6783
2	9.15413	9.1541												6.84733	6.8473
3	10.0831	10.0831												8.27733	8.2773
3	10.6363	10.6363												7.63018	7.6302
3	10.6572	10.6572												8.5696	8.5696
4	10.7511	10.7511												7.73456	7.7346
4	10.772	10.772												6.8682	6.8682
4	10.3023	10.3023												7.31704	7.317
5	11.106	11.106												7.16047	7.1605
5	10.8138	10.8138												7.25441	7.2544
5	11.3148	11.3148												7.24397	7.244
6	11.0956	11.0956
6	10.6781	10.6781
6	9.78041	9.7804
7	8.91405	8.9141
7	8.33996	8.34
7	10.1144	10.1144
8	8.37128	8.3713
8	7.61974	7.6197
8	6.77426	6.7743
9	6.16886	6.1689
9	5.67827	5.6783
9	6.84733	6.8473
10	8.27733	8.2773
10	7.63018	7.6302
10	8.5696	8.5696
11	7.73456	7.7346
11	6.8682	6.8682
11	7.31704	7.317
12	7.16047	7.1605
12	7.25441	7.2544
12	7.24397	7.244

## Sheet: Root activity
	absorbance			absorbance			absorbance			absorbance			absorbance			absorbance
species	LB			LB			LB			M30-35			M30-35			M30-35
Salt concentration	0mM		Root activity	150mM		Root activity	300mM		Root activity	0mM		Root activity	150mM		Root activity	300mM		Root activity
The first week	0.891	436.635	1091.59	1.289	631.674	1579.19	0.839	411.152	1027.88	0.812	397.921	994.802	1.485	727.724	1819.31	1.031	505.242	1263.1
	0.731	358.227	895.566	1.288	631.184	1577.96	0.878	430.264	1075.66	0.749	367.047	917.619	1.325	649.316	1623.29	0.901	441.535	1103.84
	0.791	387.63	969.074	1.321	647.356	1618.39	0.738	361.657	904.142	0.738	361.657	904.142	1.551	760.068	1900.17	0.889	435.654	1089.14
	0.804333	394.164	985.409	1.29933	636.738	1591.85	0.818333	401.024	1002.56	0.766333	375.542	938.854	1.45367	712.369	1780.92	0.940333	460.81	1152.03
		0	0		0	0		0	0		0	0		0	0		0	0
		0	0		0	0		0	0		0	0		0	0		0	0
In the second week of	0.849	416.052	1040.13	1.5	735.075	1837.69	1.47	720.374	1800.93	0.857	419.973	1049.93	1.348	660.587	1651.47	1.188	582.179	1455.45
	0.623	305.301	763.253	1.338	655.687	1639.22	1.342	657.647	1644.12	0.781	382.729	956.823	1.422	696.851	1742.13	1.346	659.607	1649.02
	0.842	412.622	1031.56	0.85	416.543	1041.36	1.685	825.734	2064.34	0.808	395.96	989.901	1.249	612.072	1530.18	0.823	403.311	1008.28
	0.771333	377.992	944.98	1.22933	602.435	1506.09	1.499	734.585	1836.46	0.815333	399.554	998.885	1.33967	656.504	1641.26	1.119	548.366	1370.91
		0	0		0	0		0	0		0	0		0	0		0	0
		0	0		0	0		0	0		0	0		0	0		0	0
The third week	0.891	436.635	1091.59	1.236	605.702	1514.25	0.828	405.761	1014.4	0.822	402.821	1007.05	1.293	633.635	1584.09	1.185	580.709	1451.77
	0.538	263.647	659.117	1.066	522.393	1305.98	0.822	402.821	1007.05	0.714	349.896	874.739	1.314	643.926	1609.81	1.066	522.393	1305.98
	0.734	359.697	899.242	1.285	629.714	1574.29	0.857	419.973	1049.93	0.806	394.98	987.451	1.223	599.331	1498.33	0.936	458.687	1146.72
	0.721	353.326	883.315	1.19567	585.936	1464.84	0.835667	409.518	1023.8	0.780667	382.566	956.414	1.27667	625.63	1564.08	1.06233	520.596	1301.49
								0	0		0	0
1	1091.59	1091.59	1091.59
1	895.566	895.566	895.566
1	969.074	969.074	969.074
2	1579.19	1579.19	1579.19
2	1577.96	1577.96	1577.96
2	1618.39	1618.39	1618.39
3	1027.88	1027.88	1027.88
3	1075.66	1075.66	1075.66
3	904.142	904.142	904.142
4	994.802	994.802	994.802
4	917.619	917.619	917.619
4	904.142	904.142	904.142
5	1819.31	1819.31	1819.31
5	1623.29	1623.29	1623.29
5	1900.17	1900.17	1900.17
6	1263.1	1263.1	1263.1
6	1103.84	1103.84	1103.84
6	1089.14	1089.14	1089.14
7	1091.59	1091.59	1091.59
7	659.117	659.117	659.117
7	899.242	899.242	899.242
8	1514.25	1514.25	1514.25
8	1305.98	1305.98	1305.98
8	1574.29	1574.29	1574.29
9	1014.4	1014.4	1014.4
9	1007.05	1007.05	1007.05
9	1049.93	1049.93	1049.93
10	1007.05	1007.05	1007.05
10	874.739	874.739	874.739
10	987.451	987.451	987.451
11	1584.09	1584.09	1584.09
11	1609.81	1609.81	1609.81
11	1498.33	1498.33	1498.33
12	1451.77	1451.77	1451.77
12	1305.98	1305.98	1305.98
12	1146.72	1146.72	1146.72

## Sheet: dry and fresh weight
Time-species-salt concentration	The fresh weight on the ground	The root fresh weight	The total fresh weight	Above ground dry weight	The root dry weight	The total dry weight
The first week-LB-0mM	0.6881	0.055	0.7431	0.0664	0.0062	0.0726	1
	0.6538	0.012	0.6658	0.0552	0.0025	0.0612	1
	0.4913	0.0358	0.5271	0.0378	0.006	0.0387	1
	0.4518	0.0244	0.4762	0.0327	0.0038	0.0365	1
	0.3461	0.0453	0.3914	0.025	0.0019	0.0269	1
	0.5838	0.0218	0.6056	0.0648	0.0066	0.0714	1
			0
The first week-LB-150mM	0.5305	0.0464	0.5769	0.0573	0.0045	0.0618	2
	0.3925	0.0502	0.4427	0.0493	0.0071	0.0564	2
	0.2708	0.0276	0.2984	0.0359	0.0032	0.0391	2
	0.3973	0.0221	0.4194	0.0226	0.0034	0.026	2
	0.6272	0.0303	0.6575	0.0373	0.0043	0.0416	2
	0.2404	0.033	0.2734	0.0662	0.0054	0.0716	2
			0
The first week-LB-300mM	0.418	0.0224	0.4404	0.0405	0.0034	0.0439	3
	0.2867	0.0233	0.31	0.0407	0.004	0.0348	3
	0.3279	0.0374	0.3653	0.0477	0.006	0.0449	3
	0.1365	0.0211	0.1576	0.032	0.0028	0.0209	3
	0.3059	0.0211	0.327	0.0416	0.0033	0.0392	3
	0.3353	0.0137	0.349	0.0187	0.0022	0.0436	3
			0				3
The first week-M3035-0mM	0.4978	0.0644	0.5622	0.0409	0.0098	0.0507	4
	0.4354	0.0506	0.486	0.0253	0.0065	0.0318	4
	0.4742	0.0474	0.5216	0.0423	0.0035	0.0458	4
	0.5414	0.089	0.6304	0.0652	0.0097	0.0749	4
	0.5839	0.1257	0.7096	0.0329	0.0069	0.0398	4
	0.6046	0.07	0.6746	0.0365	0.0059	0.0424	4
			0
The first week-M3035-150mM	0.4643	0.1145	0.5788	0.0804	0.0101	0.0866	5
	0.5151	0.0804	0.5955	0.0635	0.0077	0.0712	5
	0.4349	0.0661	0.501	0.0431	0.004	0.0471	5
	0.6486	0.0685	0.7171	0.0468	0.007	0.0538	5
	0.3523	0.0808	0.4331	0.053	0.0074	0.0604	5
	0.3762	0.0478	0.424	0.0629	0.0062	0.073	5
			0
The first week-M3035-300mM	0.3426	0.0644	0.407	0.0366	0.0066	0.0432	6
	0.2411	0.0534	0.2945	0.0287	0.0063	0.035	6
	0.32077	0.0309	0.35167	0.0207	0.0029	0.0236	6
	0.308	0.0506	0.3586	0.0371	0.0043	0.0414	6
	0.2504	0.0474	0.2978	0.0231	0.0072	0.0303	6
	0.2561	0.089	0.3451	0.0215	0.0036	0.0251	6
			0
The third week-LB-0mM	1.1856	0.2429	1.4285	0.2235	0.0309	0.2514
	1.1488	0.2547	1.4035	0.2552	0.0356	0.278
	1.3815	0.2288	1.6103	0.1786	0.0322	0.2095
	1.15904	0.1743	1.33333	0.2104	0.0596	0.246
	1.1795	0.2701	1.4496	0.1848	0.0635	0.2483
	1.2234	0.2367	1.4601	0.2067	0.0447	0.2514
The third week-LB-150mM	0.9416	0.1036	1.0452	0.1613	0.0259	0.1972
	0.7874	0.0976	0.885	0.1802	0.0213	0.2015
	1.0484	0.1124	1.1608	0.1684	0.0298	0.1982
	1.3183	0.1087	1.427	0.1864	0.0198	0.2296
	0.9381	0.0765	1.0146	0.2185	0.0198	0.2383
	1.0197	0.0804	1.1001	0.1884	0.0232	0.2182
		0.0965333	0.0965333
			0
The third week-LB-300mM	0.5517	0.0601	0.6118	0.1046	0.0122	0.1168
	0.4789	0.0565	0.5354	0.1038	0.0114	0.1152
	0.2223	0.0232	0.2455	0.1035	0.0098	0.1176
	0.4371	0.0766	0.5137	0.087	0.0141	0.1177
	0.4334	0.0374	0.4708	0.1061	0.0122	0.1183
	0.4728	0.0692	0.542	0.0905	0.0171	0.1076
		0	0
The third week-M3035-0mM	1.1003	0.1804	1.2807	0.2188	0.0251	0.2439
	1.24174	0.2295	1.47124	0.2372	0.0671	0.3043
	1.5134	0.3133	1.8267	0.0987	0.052	0.1507
	1.2094	0.2327	1.4421	0.3929	0.0662	0.4591
	1.6741	0.229	1.9031	0.1995	0.0658	0.2653
	1.1188	0.2596	1.3784	0.2647	0.066	0.3307
		0.24075	0.24075
			0
The third week-M3035-150mM	0.995	0.1987	1.1937	0.2073	0.0306	0.2479
	1.4433	0.1305	1.5738	0.2526	0.0393	0.2903
	1.1184	0.1436	1.262	0.2235	0.031	0.2346
	0.9691	0.1748	1.1439	0.2073	0.0245	0.2379
	0.96	0.1207	1.0807	0.2082	0.0406	0.2475
	1.3122	0.1198	1.432	0.1851	0.0377	0.2161
		0.148017	0.148017
			0
The third week-M3035-300mM	0.6998	0.0987	0.7985	0.1822	0.0289	0.2011
	0.6534	0.1035	0.7569	0.1333	0.0222	0.1455
	0.6589	0.1436	0.8025	0.1238	0.0149	0.1354
	0.659	0.1048	0.7638	0.1065	0.0193	0.1214
	0.6374	0.0707	0.7081	0.1081	0.0271	0.1274
	0.6936	0.1198	0.8134	0.1605	0.0193	0.1876

## Sheet: Standard phosphorus content
	Phosphorus content/mg	700nm（ absorbance）
	0	0
	0.1	0.053
	0.2	0.1
	0.3	0.139
	0.4	0.2
	0.5	0.241
	0.6	0.28
	Standard phosphorus content curve

## Sheet: saponin content—standard curve
Oleanolic acid concentration（mg/ml）	absorbance		Oleanolic acid concentration（mg/ml）	absorbance					absorbance	Content of saponins（mg/ml）	Content of saponins（mg/g. DW）
0	0		0.2	0.285333					0.511	0.387876	3.87876
0	0		0.3	0.432667					0.49	0.369022	3.69022
0	0		0.4	0.525667					0.482	0.36184	3.6184
0.2	0.265		0.5	0.632667					0.703	0.560253	5.60253
0.2	0.307		0.6	0.771					0.694	0.552173	5.52173
0.2	0.284		0.7	0.834					0.705	0.562049	5.62049
0.3	0.408								0.453	0.335803	3.35803
0.3	0.431								0.438	0.322336	3.22336
0.3	0.459								0.461	0.342986	3.42986
0.4	0.542								0.482	0.36184	3.6184
0.4	0.514								0.494	0.372613	3.72613
0.4	0.521								0.453	0.335803	3.35803
0.5	0.639								0.703	0.560253	5.60253
0.5	0.658								0.671	0.531524	5.31524
0.5	0.601								0.661	0.522546	5.22546
0.6	0.79								0.536	0.410321	4.10321
0.6	0.786								0.52	0.395956	3.95956
0.6	0.737								0.49	0.369022	3.69022
0.7	0.874
0.7	0.805
0.7	0.823

## Sheet: root activity-standard curve
	Standard curve of root activity	absorbance
	0	0
	20	0.019
	40	0.072
	80	0.166
	120	0.234
	160	0.336
